## CORRECTION

# Correction: TET3 is a positive regulator of mitochondrial respiration in Neuro2A cells

The *PLOS ONE* Staff

## Notice of Republication

This article was republished on February 15, 2024, to correct errors in the figures. Figure 2 and Figure 3 were inadvertently swapped, and Figure 4 was incorrectly published. The article's Data Availability statement has also been updated. The publisher apologizes for these errors. Please download this article again to view the correct version. The originally published, uncorrected article and the republished, corrected articles are provided here for reference.

## Supporting information

**S1 File. Originally published, uncorrected article.**

(PDF)

**S2 File. Republished, corrected article.**

(PDF)

## Reference

1. Leon Kropf V, Albany CJ, Zoccarato A, Green HLH, Yang Y, Brewer AC (2024) TET3 is a positive regulator of mitochondrial respiration in Neuro2A cells. *PLoS ONE* 19(1): e0294187. <https://doi.org/10.1371/journal.pone.0294187> PMID: 38227585

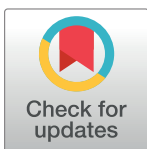

## OPEN ACCESS

**Citation:** The *PLOS ONE* Staff (2024) Correction: TET3 is a positive regulator of mitochondrial respiration in Neuro2A cells. *PLoS ONE* 19(2): e0300015. <https://doi.org/10.1371/journal.pone.0300015>

**Published:** February 29, 2024

**Copyright:** © 2024 The PLOS ONE Staff. This is an open access article distributed under the terms of the [Creative Commons Attribution License](https://creativecommons.org/licenses/by/4.0/), which permits unrestricted use, distribution, and reproduction in any medium, provided the original author and source are credited.
